# Supplementary material
Source: PubMed Central journal article supplement (PMC10277933)
Supplement: NIHMS1887485-supplement-sup_material.pdf [file NIHMS1887485-supplement-sup_material.pdf]

**Supplementary information**

---

**Tracking bacterial lineages in complex and dynamic environments with applications for growth control and persistence**

---

In the format provided by the authors and unedited

# 1 **Supplementary Information – Tracking bacterial** 2 **lineages in complex and dynamic environments with** 3 **applications to growth control and persistence**

4 **Somenath Bakshi<sup>1,2,+</sup>, Emanuele Leoncini<sup>1,+</sup>, Charles Baker<sup>2</sup>, Silvia Cañas Duarte<sup>1</sup>,**  
5 **Burak Okumus<sup>4</sup>, and Johan Paulsson<sup>1</sup>**

6 <sup>1</sup>Department of Systems Biology, Harvard Medical School, Boston, Massachusetts, USA

7 <sup>2</sup>Department of Engineering, Cambridge University, Cambridge, UK

8 <sup>3</sup>Biophysics Program, Harvard University, Boston, Massachusetts, USA

9 <sup>4</sup>Current Address: ArcherDX, Saint Louis, Missouri, USA

10 <sup>+</sup>these authors contributed equally to this work

## 11 **Contents**

|    |                |                                                                                                 |           |
|----|----------------|-------------------------------------------------------------------------------------------------|-----------|
| 12 | <b>Note 1</b>  | <b>Design of flow paths to prevent biofilm formation and cross-contamination, and to ensure</b> |           |
| 13 |                | <b>clean recovery from stationary phase</b>                                                     | <b>3</b>  |
| 14 | <b>Note 2</b>  | <b>Anti-clogging agents and automated bubble-traps</b>                                          | <b>5</b>  |
| 15 | <b>Note 3</b>  | <b>Controls for temperature variations across the fluidic setup</b>                             | <b>6</b>  |
| 16 | <b>Note 4</b>  | <b>Optimization of the mother-machine architecture</b>                                          | <b>7</b>  |
| 17 | <b>Note 5</b>  | <b>Point spread function bleed-through and trench-gap optimization</b>                          | <b>9</b>  |
| 18 | <b>Note 6</b>  | <b>Mother-machine architecture for high-throughput imaging</b>                                  | <b>11</b> |
| 19 | <b>Note 7</b>  | <b>Comparison of bulk growth with growth in microfluidic devices</b>                            | <b>13</b> |
| 20 | <b>Note 8</b>  | <b>Comparison of growth-dynamics in the bulk culture and at single-cell level</b>               | <b>14</b> |
| 21 | <b>Note 9</b>  | <b><i>B. subtilis</i> and <i>E. coli</i> follow adder mode during exponential phase</b>         | <b>16</b> |
| 22 | <b>Note 10</b> | <b>Transition from adder-mode towards timer-mode during entry to stationary phase</b>           | <b>17</b> |
| 23 | <b>Note 11</b> | <b><i>B. subtilis</i> behave as sizer during exit from stationary phase</b>                     | <b>18</b> |
| 24 | <b>Note 12</b> | <b>PSF artifacts in agar-pad images</b>                                                         | <b>19</b> |
| 25 | <b>Note 13</b> | <b>Data quality, analysis, and growth-measurements</b>                                          | <b>20</b> |
| 26 | <b>Note 14</b> | <b>Rate-maintenance and cell size in stationary phase</b>                                       | <b>22</b> |
| 27 | <b>Note 15</b> | <b>Size regulation in different temperatures</b>                                                | <b>23</b> |
| 28 | <b>Note 16</b> | <b>Bulk measurements of persisters</b>                                                          | <b>24</b> |
| 29 | <b>Note 17</b> | <b>Growth-curve experiments <i>B. subtilis</i></b>                                              | <b>25</b> |



|    |                   |                                    |           |
|----|-------------------|------------------------------------|-----------|
| 30 | <b>Note 18</b>    | <b>Strain construction control</b> | <b>26</b> |
| 31 | <b>Note 19</b>    | <b>Media Recipes</b>               | <b>27</b> |
| 32 | <b>References</b> |                                    | <b>28</b> |

33 **Note 1 Design of flow paths to prevent biofilm formation and cross-contamination, and**  
34 **to ensure clean recovery from stationary phase**

35 We have designed the flow path to ensure that there is no zero-flow pocket for bacteria to get trapped and eventually  
36 form biofilms which can not only clog the flow, but also reduce the quality of the nutrient arriving to the microfluidic  
37 device in arbitrary ways. We found that bacteria can get trapped into in-line solenoid valves commonly used in  
38 microfluidic applications. Therefore, all such solenoid valves were avoided and instead we used pinch valves where  
39 cells never have to enter valve compartments and can flow through tubing through the entire path. Not only the  
40 choice of valves, but also the connector geometry can have an impact. In particular, connectors with orthogonal  
41 geometry can cause particles to get trapped, as shown by Vigolo *et al.* [1]. For this reason, we have avoided the use  
42 of orthogonal connectors and we use either 180° zero-dead-volume connectors or 120° Teflon Y-junctions. To ensure  
43 proper starvation, we also examined different tubing material, and found that, except Teflon and silicone tubing, all  
44 other types of tubing lead to release of tubing material in the flow which the bacteria can consume during nutrient  
45 starvation. Therefore, the entire flow path was constructed with Teflon tubing connected with zero dead-volume  
46 connectors (made of PEEK material), except the pinch-valves and peristaltic pumps, where we used short segments  
47 of silicone tubing that allow pinching.

48  
49 When the culture medium in the flask is inoculated with cells, the cells naturally experience transition from  
50 exponential to stationary phase as the nutrients of the medium runs out. However, in order to bring cells in stationary  
51 phase to the exponential phase, when we change the culture path to flow fresh medium, we have to make sure that no  
52 cells from the original culture is present in the fluidic path and that there is no delay in the switch. An uninterrupted  
53 recovery from stationary phase to exponential phase ensures robust reversibility of the process, and therefore allows  
54 us to follow the same batch of cells through multiple rounds of entry and exit from stationary phase (see Figure 1a  
55 and b). At the same time, it is important to eliminate any delay in the switch from culture to fresh medium, to mimic  
56 inoculation of cells from stationary phase into fresh medium. To reduce the delay during the switch between the  
57 culture flow and the recovery media, we use high flow rate to bring the recovery media close to the microfluidic  
58 device and place the pinch-valve switches on the microscope stage so that they are very close the microfluidic chip.  
59 The switch has an alternative path that allows us to divert the flow towards a waste during the fast-flow that also  
60 moves the culture present in the path to the waste and the flow is only directed to microfluidics device once the entire  
61 tubing is free of culture.

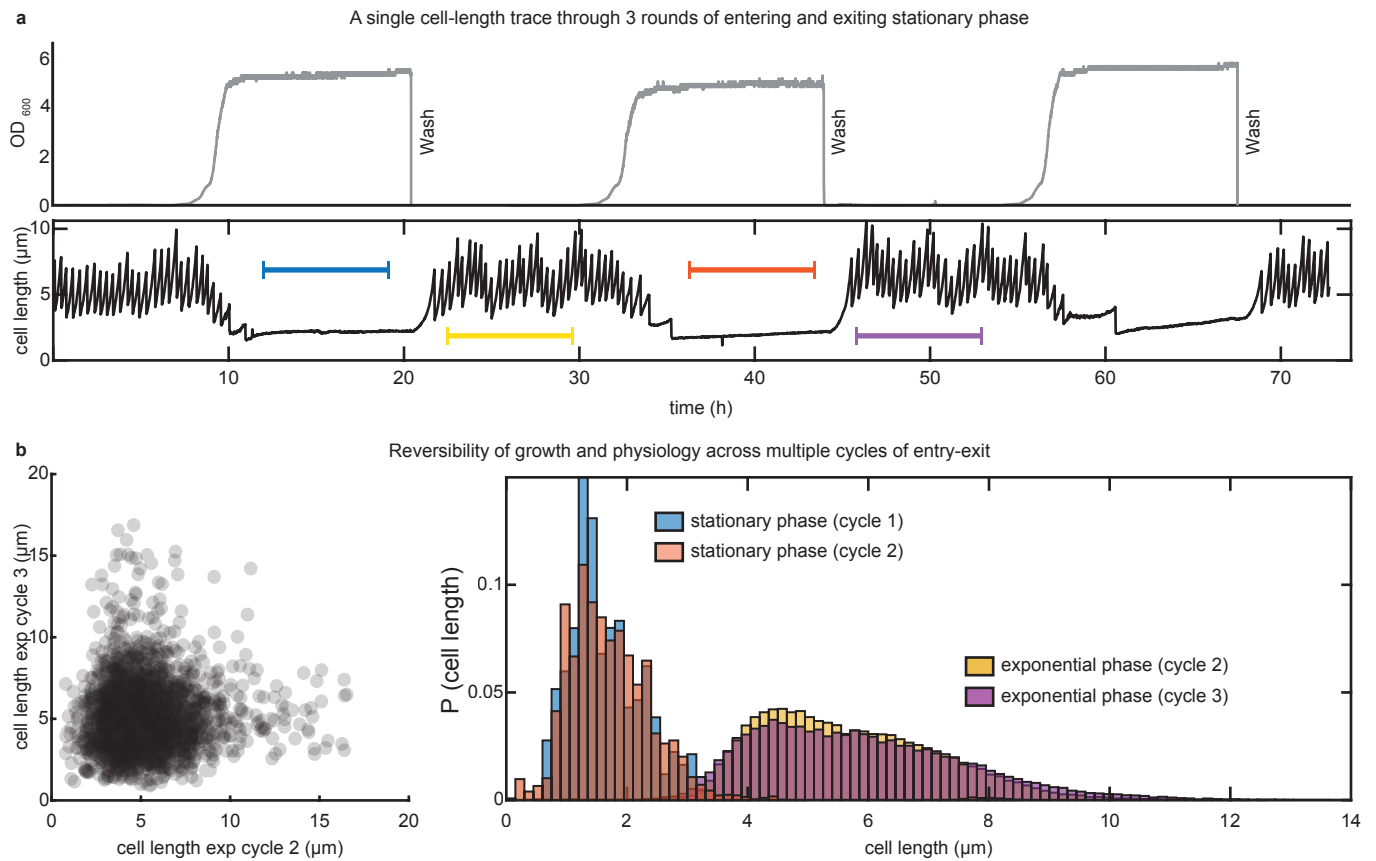

**Supplementary Figure 1.** (a) Example single cell length data for the same cell entering and exiting stationary phase through 3 rounds of growth-curve. (b) Statistical analysis of reversibility of physiology during multiple rounds of entry and exit. Left: Scatter plot of cell length in exponential phase after the exit from stationary phase in cycle 1 and after exit from stationary phase in cycle 2. Right: Comparing distribution of cell lengths in stationary phase and in exponential phase in different cycles. Color-code in the legend matches the range shown in (a).

62 **Note 2 Anti-clogging agents and automated bubble-traps**

63 In order to reduce the formation of biofilms or the adherence of cells to the microfluidic device, we use Pluronic F108  
64 (Sigma Aldrich, 542342-250G, 0.8% of a 0.1 g/ml stock) to passivate the PDMS surface [2]. This concentration  
65 has been verified to have no impact on cell physiology in exponential growth [3, 4]. In order to ensure that the  
66 concentration of Pluronic used in this study does not impact cell growth and physiology through the entire growth-  
67 curve, we ran several growth curves in a plate reader using various concentrations of Pluronic F108 (see Figure 2).  
68 We start to observe an impact on growth dynamics and final OD only above concentrations of 3.2% of F108 0.1 g/ml  
69 stock. Therefore, we have safely used 0.8% of 0.1 g/ml Pluronic stock solutions. Experiments for *B. subtilis* were  
70 done using 0.1 mg/ml BSA, as described in our previous work [8].

71 The continuous shaking of the culture causes bubbles to form, which is further exacerbated with the addition of  
72 Pluronic F108 or BSA, and can extensively affect measurements in microfluidic devices. The bubbles can also get  
73 trapped in the microfluidic device and affect cell growth in the long run. In order to remove these bubbles from the  
74 flowing culture before they enter the microfluidic device, we have custom designed automated bubble traps, since  
75 the commercial ones will trap the flowing cells in the membrane and thereby will not only cause the nutrient profile  
76 to arbitrarily change due to cellular consumption in flow-path, but also membranes to get jammed due to biofilm  
77 formation over time. The bubble traps designed in this study can remove bubbles from the culture flow for indefinite  
78 amount of time and are also used for a continuous monitoring of the optical density of the culture.

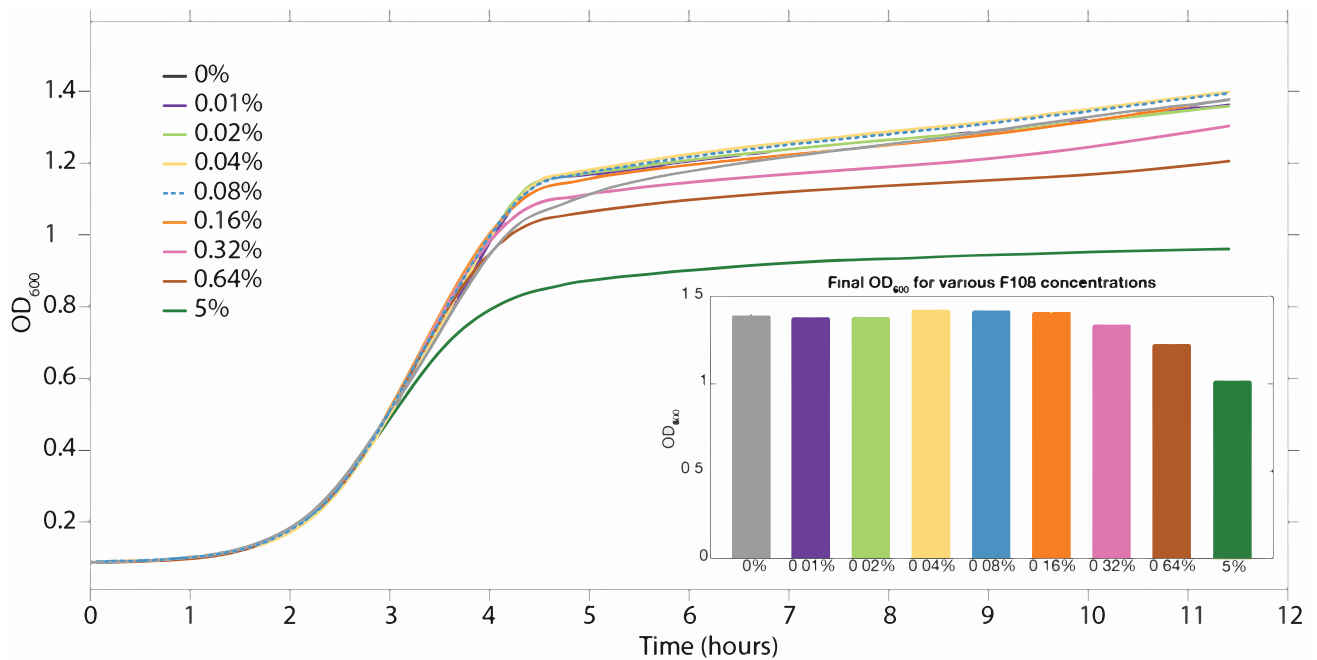

**Supplementary Figure 2.**  $OD_{600}$  vs time plot (average of 12 replicates) for nine different concentrations of F108 is shown. All curves were aligned at  $OD = 0.5$  to account for different lag times of growth.

79 **Note 3 Controls for temperature variations across the fluidic setup**

80 We performed fluorescent IR imaging in order to ensure the thermal uniformity of the entire platform (see Figure 3a).  
81 Temperature in the incubator housing the growing platform is continuously monitored using a custom Arduino-based  
82 logger (see Figure 3b), displaying minimal fluctuations over long stretches of time. The temperature in the imaging  
83 incubator is monitored using inbuilt sensors of the microscope incubator (OKOLAB).

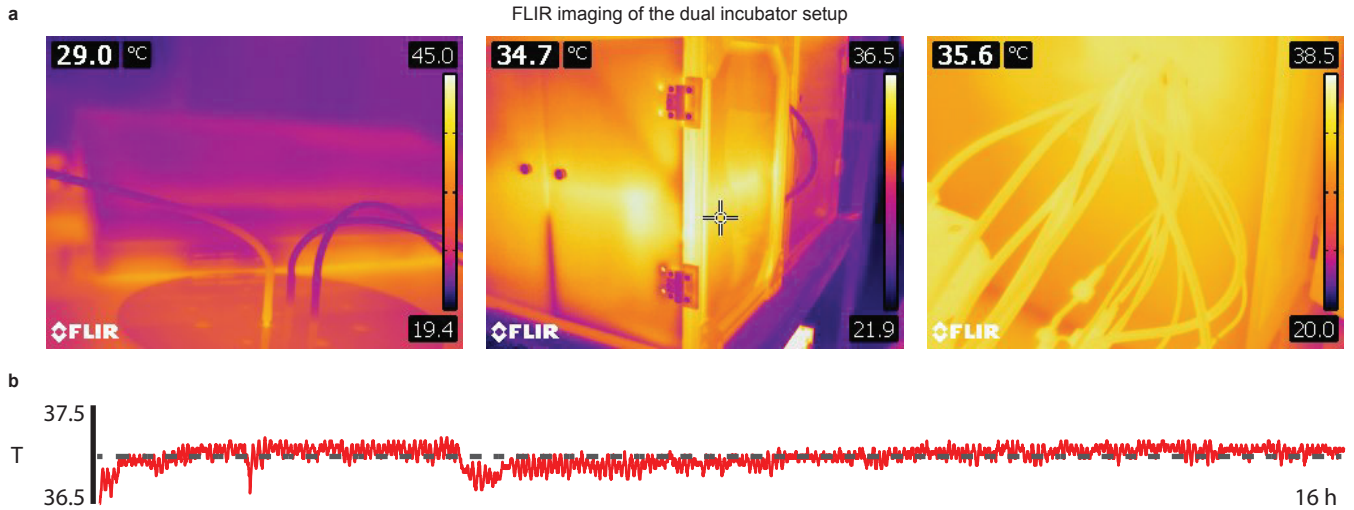

**Supplementary Figure 3.** (a) The left panel shows how quickly heat-loss happens through the wall of thin tubes in the absence of insulating ducts. The medium and right panels shows the uniform thermal profile of the custom-designed incubator and tubing. (b) A sample trace of the temperature reading off a probe near the shaker during a regular experiment duration.

#### 84 **Note 4 Optimization of the mother-machine architecture**

85 The design of the mother machine also had to be highly optimized to handle the vast changes in cell size along  
86 the growth curve (15-fold for MG1655), as well as the increased throughput requirements of typical growth-curve  
87 experiments and to prevent clogging from dense cultures all while maintaining proper diffusive feeding and retention  
88 of cells for experiments that typically last multiple days. In this section, we discuss the optimization of the trench  
89 (narrow channels where the cells are loaded) dimensions, and in the later sections, we discuss optimization of the  
90 gap between trenches and the layout of the flow-path.

91  
92 We have sampled approximately 540 combinations of the width, height, and length of the narrow trenches to  
93 find the optimal combination of parameters for each growth-condition (Figure 4a, b and c). The length and width  
94 of the trenches are optimized for better diffusive feeding and loading, and longer retention of cells in the trenches.  
95 If the trenches are not wide or tall enough, then the cells may not load into the trenches and even if they do load  
96 properly, the tight fit can affect their growth rate. If these dimensions are too large, then the cells can re-arrange  
97 themselves or load side by side in a single trench (see Figure 4e). If trenches are too short, then cells are not retained  
98 properly and if they are too long, it can affect the nutrient content at the end of the trench (see Figure 4d). It is thus  
99 important to correctly determine these parameters; however, bacteria often vary substantially in size depending on  
100 growth media and environmental conditions, thus no single combination of trench dimensions is optimal for all  
101 conditions. Along with feeding and retention, the trench-width has to be also optimized for avoiding double loading  
102 of cells in each trench, i.e. cells get loaded side by side in a trench, which causes additional stress to the cells and  
103 also cause technical challenges for cell-segmentation. This gets even trickier when cells change their width as they  
104 transition from exponential to stationary phase along the growth-curve. Along with the trench width and trench  
105 length, another important parameter is the height of the trench roof as it plays key-role in loading efficiency and  
106 keeping the entire cell in focus, factors which counteract each other. We surveyed about 12 different trench-widths, 9  
107 different trench-lengths for each of those trench-widths, and 5 different trench-heights, and out of 540 combinations  
108 of each of those parameters we chose the settings that allowed best growth and long retention times. For the growth  
109 curve experiments described in this paper, we chose trench dimensions that are optimal for exponential phase where  
110 cells are largest (trench-length =  $25 \mu m$ , trench width =  $1.5 \mu m$ , trench height =  $1.28 \mu m$ ). We find that this choice  
111 of trench size is just tight enough to properly retain the small stationary phase cells and does not artificially impact  
112 growth rates at any point during the growth curve. Using the correct parameters makes it possible to effectively  
113 segment each cell throughout the growth-curve as they change their size and aspect ratio.

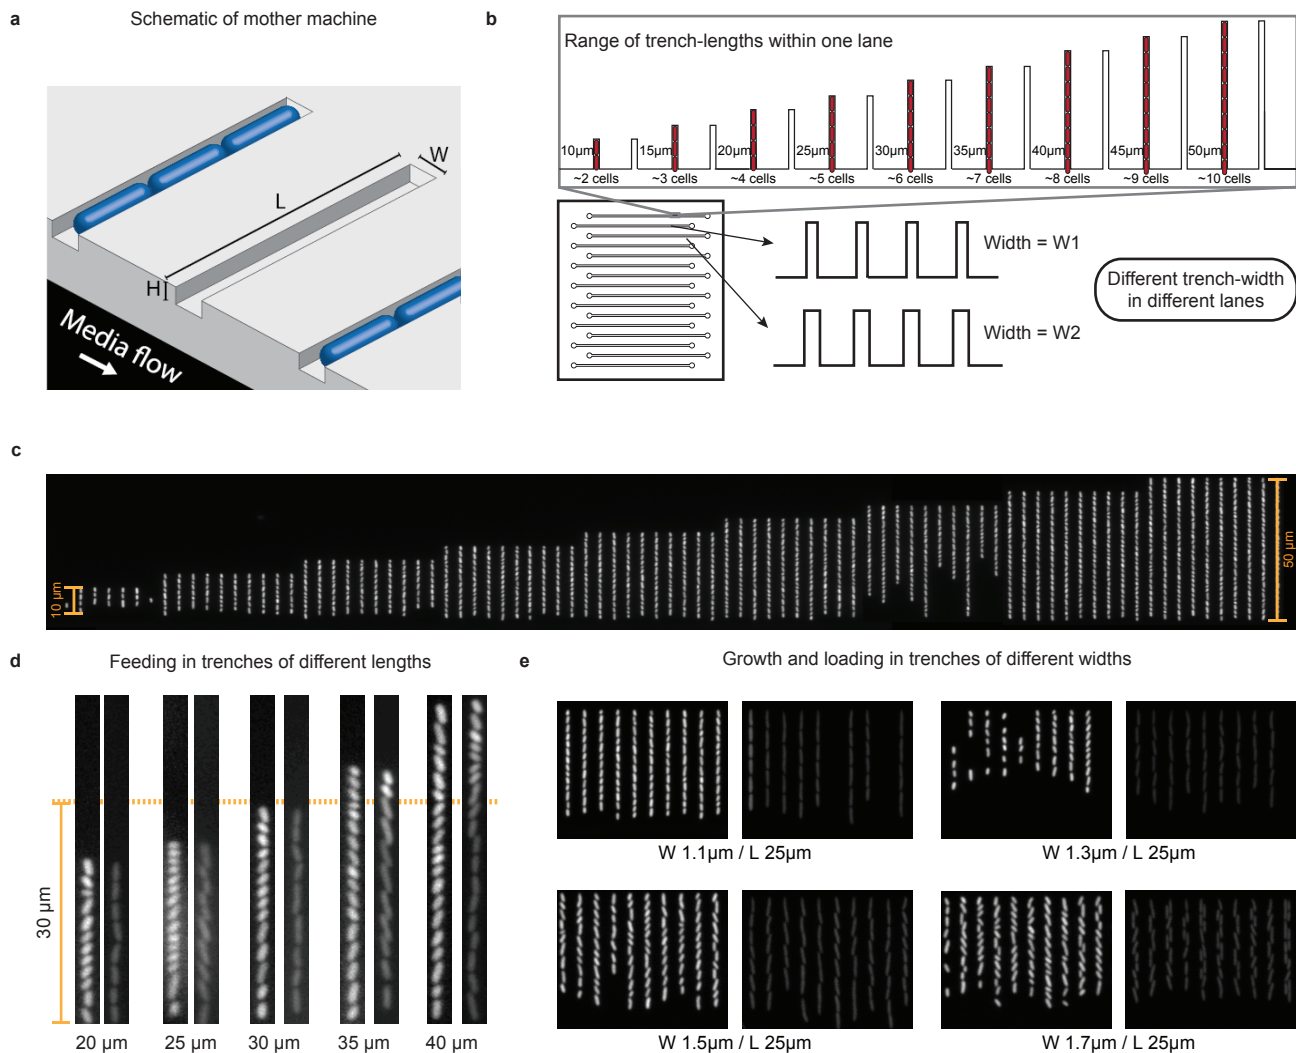

**Supplementary Figure 4.** (a) 3D schematic to illustrate different dimensions of the mother-machine design. (b) Sampler chip (schematic of the chip in left bottom corner) to verify multiple different parameters in the same experiment. Each lane has arrays of trenches from 9 different trench-length ( $10 \mu m$  to  $50 \mu m$ ). Different lanes have trenches of different widths. (c) Sample field of view of one of the lanes (Note: cells are in stationary phase in this frame, as cells are lost from the short trenches within a short time after fresh media is flown). (d) Nutrient availability depends on trench-length. Five different sample trenches are shown in pairs. The left panel shows cells in stationary phase ( $t = 0$ ) and right panel shows the same trench after 6 hours of flow of conditioned medium. The conditioned medium does not reach beyond  $30 \mu m$  (orange dotted line). (e) Cell loading in trenches of different widths. The left panel shows cells in stationary phase and right is exponential phase. In the narrow trenches ( $1.1 \mu m$ ) cells are constricted and straight (doubling time is slow, 28 min, compared to 22 min in  $1.3$  and  $1.5 \mu m$  trenches), whereas in the widest trenches ( $1.7 \mu m$ ) the cells tend to double-load.

## 114 **Note 5 Point spread function bleed-through and trench-gap optimization**

115 The point-spread function of an imaging system makes the intensity from a point-source emitter spread through a  
116 much wider area corresponding to the wavelength of the emission. Therefore, the fluorescent emission from a cell  
117 spreads away from the cell creating a decaying signal. This causes fluorescence from nearby cells to be assigned to  
118 each other, which distorts the variability of intensity across population. In conventional imaging systems that use  
119 microcolonies of cells, like agar-pad, or microfluidic platforms (like commercial CellASIC etc), such bleed-through  
120 effects are very significant and unavoidable, which makes the measurements unreliable. Mother machine allows  
121 cells to be kept apart from each other in an array of specified distances. However, even then, depending on the  
122 distance between neighboring trenches, the bleed-through can be significant. Therefore, we attempted to quantify  
123 whether the dimensions of our device allow an artifact-free measurement of such variability.

124  
125 The cells within a trench of mother machine, the mother-cell and its daughter and grand- daughter, contribute  
126 to each other's intensity through such PSF bleed-through. The cells from different trenches can also contribute  
127 to each other's intensity through such bleed-through, as a function of the distance between trenches (see Figure  
128 5a and b). The further the trenches are the lower will be the effect of such crosstalk. To quantify the effect of  
129 point-spread function bleed-through from neighbor trenches, we have developed an assay that uses signals from  
130 YFP expressed from a plasmid that goes to zero when the plasmid is lost. We use an empty position in a trench  
131 (trench-of-interest) next to the trench containing the YFP expressing cell (trench-neighbor) to quantify the amount  
132 of fluorescence bleed-through by comparing the intensity in the empty trench when the YFP signal is present and  
133 lost in the neighboring trench. In order to quantify the bleed-through as a function of the gap between two nearby  
134 trenches, we used microfluidic devices with varying gap between the trenches ( $4\ \mu\text{m}$ ,  $6\ \mu\text{m}$ ,  $8\ \mu\text{m}$ ,  $10\ \mu\text{m}$ ). We find  
135 that when the trenches are  $4\ \mu\text{m}$  apart, the neighbor cell can contribute about 1.1% of intensity to a cell in nearby  
136 trench. Since every trench in a mother machine has two nearby trenches on both sides, the total contribution from  
137 both trenches is 2.2%. For the microfluidic device where the trenches are  $10\ \mu\text{m}$  apart, the contribution is much less;  
138 0.2% from two nearby trenches. The most significant contribution to the intensity of a mother-cell, seems to be from  
139 the daughter, grand-daughter cells in the same trench, about 2.9%, which can't be avoided as it is limited by the  
140 mother machine design (see Figure 5c and d).



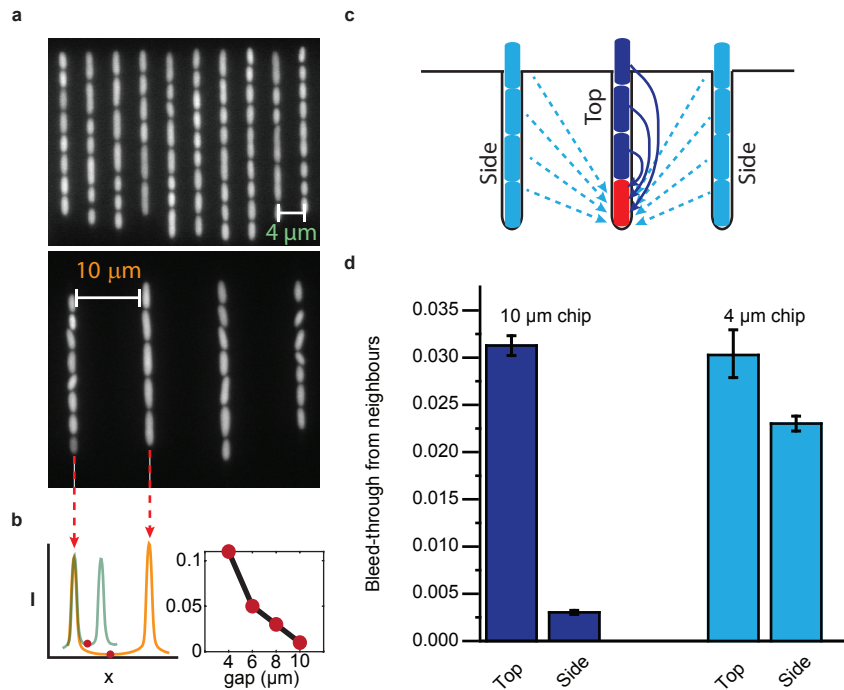

**Supplementary Figure 5.** The extent of point-spread function bleed-through depends on the distance between trenches. (a) Sample field of views of mother-machine device with different trench gaps (top:  $4\ \mu\text{m}$ ; bottom:  $10\ \mu\text{m}$ ). (b) Left: line scans of the intensity profiles show that intensity does not go down to baseline in the middle of two trenches. The height of the valley off the baseline gives the extent of the cross-talk (2 times the bleed-through from cells in each trench). The right panel shows how the bleed-through gradually drops with increasing gap between the trenches. (c) Schematic of cells in mother machine showing different component of the bleed-through from different neighbors. Cells in the same trench are referred to as 'top', while cells in the trenches from both sides are referred to as 'side'. (d) Quantification of the extent of bleed-through from the cells from the neighbor trenches 'side', and from the same trench for chips with  $10\ \mu\text{m}$  and  $4\ \mu\text{m}$  gap, respectively.

## 141 **Note 6 Mother-machine architecture for high-throughput imaging**

142 In order to increase the throughput, we started by redesigning the trench layout. First, we placed the trenches on both  
143 sides of the flow channel and used a lower magnification objective (40x, NA 0.95) that allows us to image the two  
144 rows of trenches in a single field of view (see Figure 6a). We had to reduce the width of the flow channels to bring  
145 the two rows closer, and we compensated by increasing its height. The segmentation program was customized to  
146 segment cells from the 40x image, and the tracking program was customized to handle both rows of cells in the same  
147 FOV. In the standard mother machine device we have 16 different flow channels, in which we can flow 16 different  
148 types of media in an independent manner and test 16 different strains in parallel (see Figure 6b). Each of these lanes  
149 have 8,192 trenches, giving sufficient throughput for each strain. For experiments that require higher throughput, for  
150 example for examining persister cells, we use a layout where we have combined 15 of these lanes in a snake-like  
151 architecture (see Figure 6c). The design parameters of the snake was optimized to reduce the flow-time through  
152 the entire path and to avoid clogs and blocks at the bends. In this chip we can load a single strain and 122,880 (=  $15 \cdot 8,192$ )  
153 lineages imaged in parallel. A single trench has about 5-6 cells and in a single day we get 70 division  
154 events, enabling us to observe  $10^8$  division events per day. The high-throughput experiments were done using a  
155 high NA air objective (NA 0.95, 40x, Plan Apo). However, since fluorescence imaging can cause phototoxic side  
156 effects, we could only use fluorescence imaging to sample dynamics at 6 min/frame rate. For faster imaging and  
157 higher resolution, we use a 100x apodized phase contrast objective (NA 1.3, 100x oil, PH3). Since this objective  
158 has high magnification and therefore smaller field of view, the throughput is much lower than the 40x. The phase  
159 objective, being an oil objective, also has lower travel distance, limiting the area of imaging. Therefore, we can  
160 image 3,500 lineages per minute using this setup. Phase contrast studies that do not need similar resolution were  
161 done using a 40x phase contrast air objective (NA 0.95). This system can image 160 FOVs per minute, enabling  
162 simultaneous tracking of around 30,000 separate lineages.

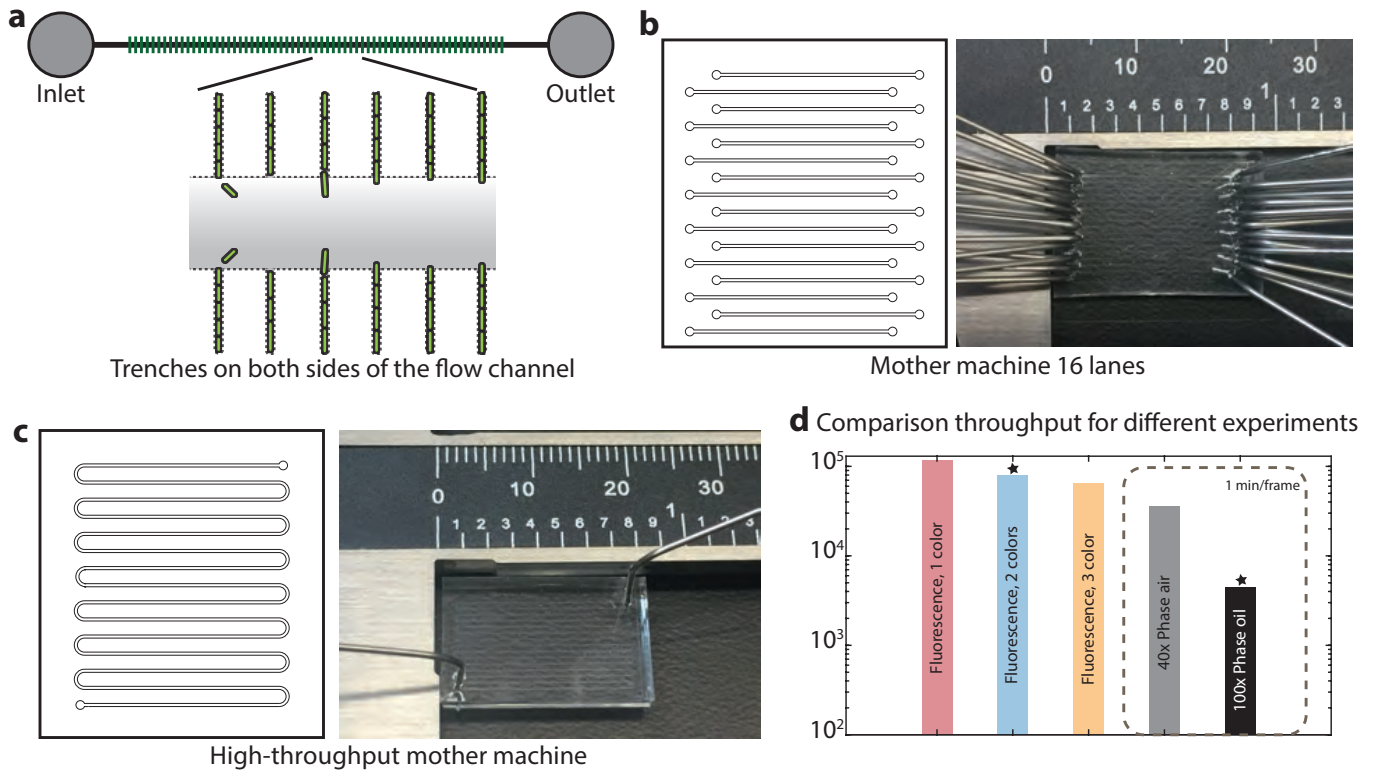

**Supplementary Figure 6.** Mother machine design: we have designed the flow paths to have trenches on both sides (a), which gives twice the throughput per field of view. Every single field of view in a 40x objective has total  $186 \pm 1$  trenches. We have two different designs of the flow path layout through the device. In the type 1 (b), there are 16 total flow-channels allowing us to load 16 different strains to monitor their physiology and gene-expression in parallel. For each strain we get 8,192 trenches to get enough high-throughput for fine-binning of the data. In the type 2 (c), we connect 15 different flow-channels with a snake-type layout and that gives a total of 122,880 trenches for one strain, which is crucial for detecting rare events like persister states. (d) The throughput of the experiment depends on imaging conditions required for that particular type of experiment. In a single-color fluorescent experiment using an air objective we can achieve the maximum throughput of tracking 131,072 cell lineages every 5 min. As the number of colors channels to be imaged increases, the throughput decreases, as the filter change and exposure times of each color contributes to the delay causing total number of cells imaged every 5 minutes to be lower. For phase contrast imaging, we are interested in tracking individual cell growth and division at least once every minute. So the throughput is lower (30,000 cells per 1 min using a 40x air phase). To get high-resolution images that enable accurate tracking and segmentation, we have used a high magnification (100x) oil lens. This further reduces the throughput and we can track 3,500 cells every one minute.

163 **Note 7 Comparison of bulk growth with growth in microfluidic devices**

164 In order to monitor the bulk-growth of the culture over time, we have used a custom-designed optical density  
165 recording system (OD-meter). The OD-meter is designed as a housing for the bubble-trap described in [Note 2](#).  
166 The detector—placed at 180° with respect to the emitter—measures the transmission of light through the sample,  
167 which serves as a metric for OD ( $OD_{600}$ ) after calibration. In Figure 7a, we show example plots of  $\log_2(OD_{600})$  over  
168 time for cultures growing in different media composition and temperatures. The growth-rate in a particular growth-  
169 condition (media/temperature) is estimated from the gradient of the steepest part of the  $\log_2(OD_{600})$  curve. The  
170 corresponding single-cell estimates are calculated from single-cell growth rate obtained from length measurements  
171 of individual cells over time. The average growth-rates from the bulk measurements (x-axis) and the single-cell size  
172 measurements in the microfluidic device (y-axis) are compared in Figure 7b.  
173

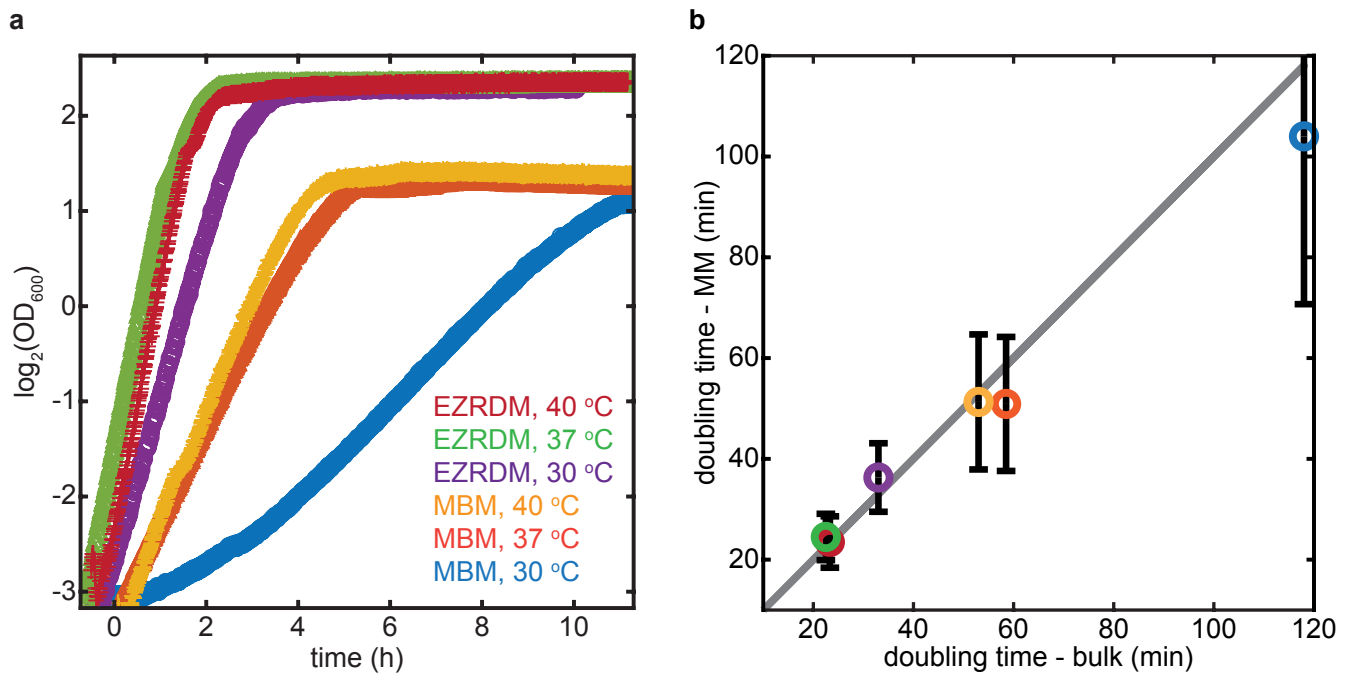

**Supplementary Figure 7.** (a) Logarithm of  $OD_{600}$  vs time for cells growing under six different growth-conditions (two media: rich-defined (EZRDM) and poor-defined (MBM) and three different temperatures: 30°C, 37°C, and 40°C). (b) Growth-rates from single-cell size measurements in mother machine (y-axis) are compared with bulk OD measurements (x-axis) for all six conditions. The grey-line corresponds to  $y = x$ .

## 174 **Note 8 Comparison of growth-dynamics in the bulk culture and at single-cell level**

175 Here we compare the growth dynamics at single-cell level (measured from change in cell length over time) and at  
176 bulk level (measured by rate of change in  $OD_{600}$  over time). In Figure 8a, we plot in blue the average length of cells  
177 loaded in the mother machine as they traverse the growth-curve and in black the  $OD_{600}$  of the growing culture that  
178 flows through the microfluidic device. The two datasets are shifted by the delay time of  $\sim 20$  minutes (time for the  
179 culture to flow from the flask to the microfluidic device). However, it is important to note that the delay is likely to  
180 be shorter than the time it would need to flow from the flask to the mother machine, since the cells continue to grow  
181 in the tubing, which is maintained at same temperature ( $37^\circ\text{C}$ ) throughout the entire path. Until  $t = 8$  h, cells are in  
182 exponential phase, and grow with an average size of  $5.81 \mu\text{m}$ . After the diauxic shift ( $t = 9.1$  h), the cell size starts  
183 to decline as the bulk growth also continues to decline. Near  $t = 11$  h into the experiment, the bulk-growth stops  
184 (OD reaches plateau), but cell size continues to decrease for a while. Examination of the single-cell length traces  
185 suggests that the specific growth-rate ( $g(t) = d\log(t)/dt$ ) of the cells also halts near that time, but some of the cells  
186 stochastically decides to divide one more round, resulting in smaller cells deeper into stationary phase (Figure 8b).

187  
188 Such discrepancy between the growth and division is also seen during the diauxic shift. Until  $t = 9$  h cells  
189 continue to grow and divide with a rate consistent with doubling the volume of a single cell and their number every  
190  $\sim 23$  minutes. Right after the diauxic shift the specific growth-rate sharply declines across the population (Figure 8c).  
191 The sharp decline in specific growth is perfectly aligned with the drop in bulk growth measurements (grey-line),  
192 and always coincides with the diauxic shift observed in OD curves. In Figure 8d, we show two example single-cell  
193 length traces that demonstrate how growth and division becomes decoupled after the diauxic shift. Starting from  
194  $t = 8.9$  h until  $t = 9.6$  h, cells continue to divide every  $\sim 23$  minutes, while the specific growth remains slow. This  
195 phenomenon is reminiscent of rate-maintenance resulting from the processive nature of replication machineries [6].  
196 The reduction of growth-rate and near constancy of splitting rate causes the cells to decrease their size rapidly. After  
197 this period, the specific growth-rate and the splitting rate both declines and cells halt growth and division. A fraction  
198 of cells stochastically divides to create two daughter cells of smaller, likely resulting from unfinished rounds of  
199 replication (Figure 8b).

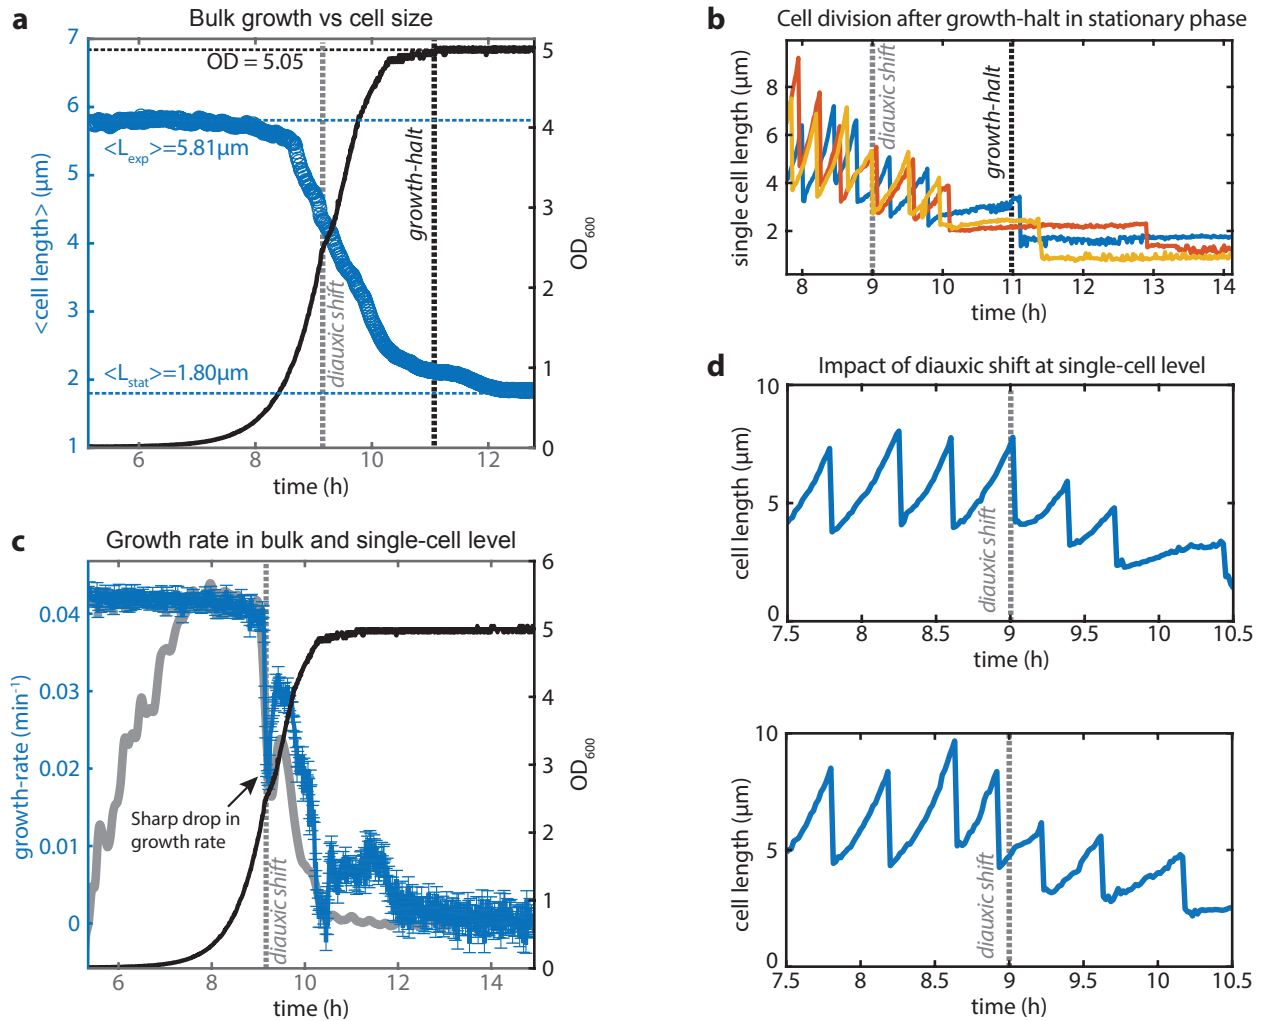

**Supplementary Figure 8.** (a) Comparison of the dynamics of optical density of the bulk culture and average length of cells trapped in mother-machine during entry to stationary phase. The bulk culture passes the diauxic point slightly after  $t = 9$  h and then growth resumes for another 2 hours before the media is exhausted at  $t = 11$  h and the bulk growth halts. The average cell length  $\langle L(t) \rangle$  continues to decline for a few hours after this due to stochastic division of cells in the absence of any growth, as shown in (b). (c) Plots of the average specific growth-rate of single cells ( $\langle g(t) \rangle = \langle d \log(L(t)) / dt \rangle$ , average rate of change of log of cell length, in blue) over time with the bulk growth-rate ( $d \log(OD_{600}(t)) / dt$ , rate of change of  $\log(OD)$ , in grey). The average growth-rate in bulk culture (0.042/minute) nicely matches the single-cell growth-rate in the mother-machine (0.043/minute) before the diauxic shift. Both sharply decline during the diauxic point, and resume after  $\sim 40$  minutes. (d) Sample single-cell length traces during showing the discrepancy between growth and division after diauxic shift. Cells slow down growth right after passing through diauxic shift, but keep dividing every  $\sim 23$  min, essentially behaving like a ‘timer’. The ‘timer’ mode lasts for two divisions, equivalent to the time needed to finish one round of replication.

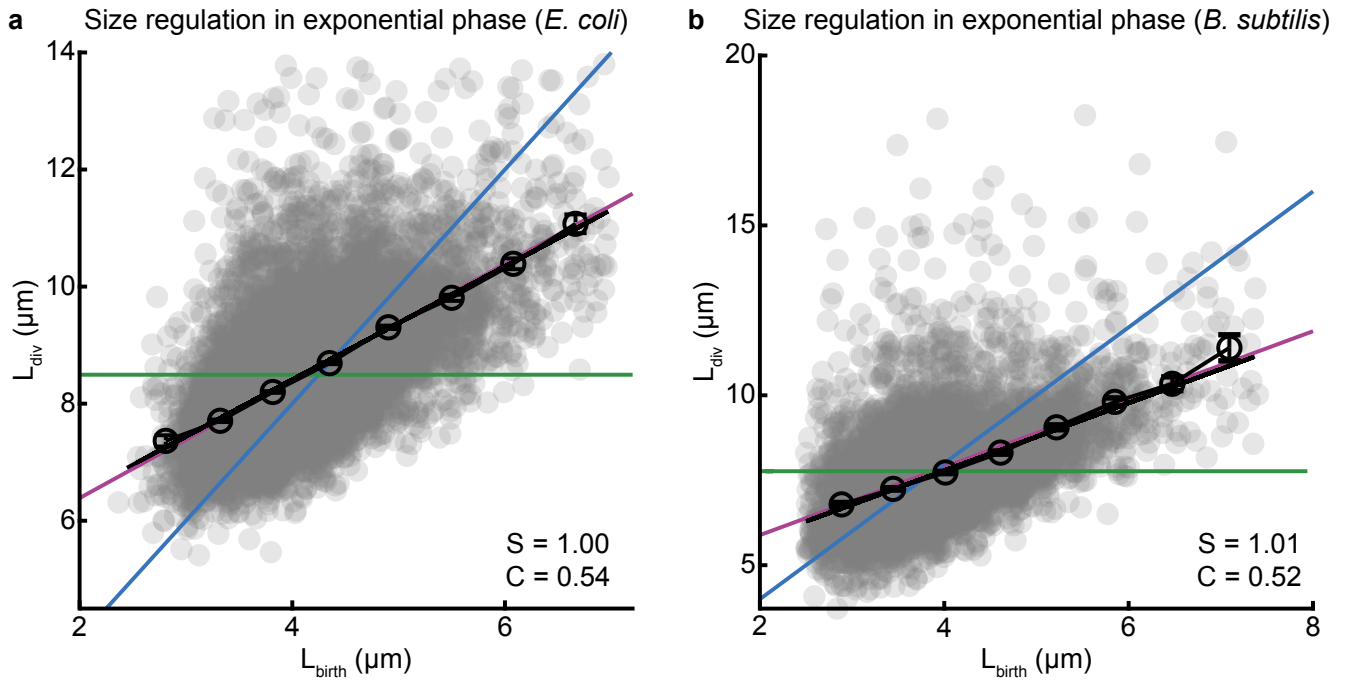

**Supplementary Figure 9.** (a) *E. coli*. Correlation between cell lengths at birth and division are plotted during exponential growth phase. Grey circles are data from single division events, and black circles are binned along the x-axis. Theoretical lines for the classic modes - timer, sizer, and adder - are shown as blue, green, and purple lines. (b) *B. subtilis*. Correlation between cell lengths at birth and division are plotted during exponential growth phase.

201 **Note 10 Transition from adder-mode towards timer-mode during entry to stationary phase**

202 The high throughput of our measurement platform allows us to bin the data in narrow time-windows to avoid  
203 averaging over continuously changing conditions. To investigate whether the cells are gradually or abruptly  
204 switching to the mixed timer-adder mode during the entry to stationary phase, we have binned the data in 2 min  
205 intervals. We have analyzed the correlation between the length at birth and at division for cells born within that  
206 interval. We see that after the diauxic shift ( $t = 9h$ ) cells gradually switch from adder mode ( $S = 1, C = 0.5$ ) towards  
207 the timer mode ( $S = 2, C = 1$ ). This suggests that cells become less corrective as they enter stationary phase.

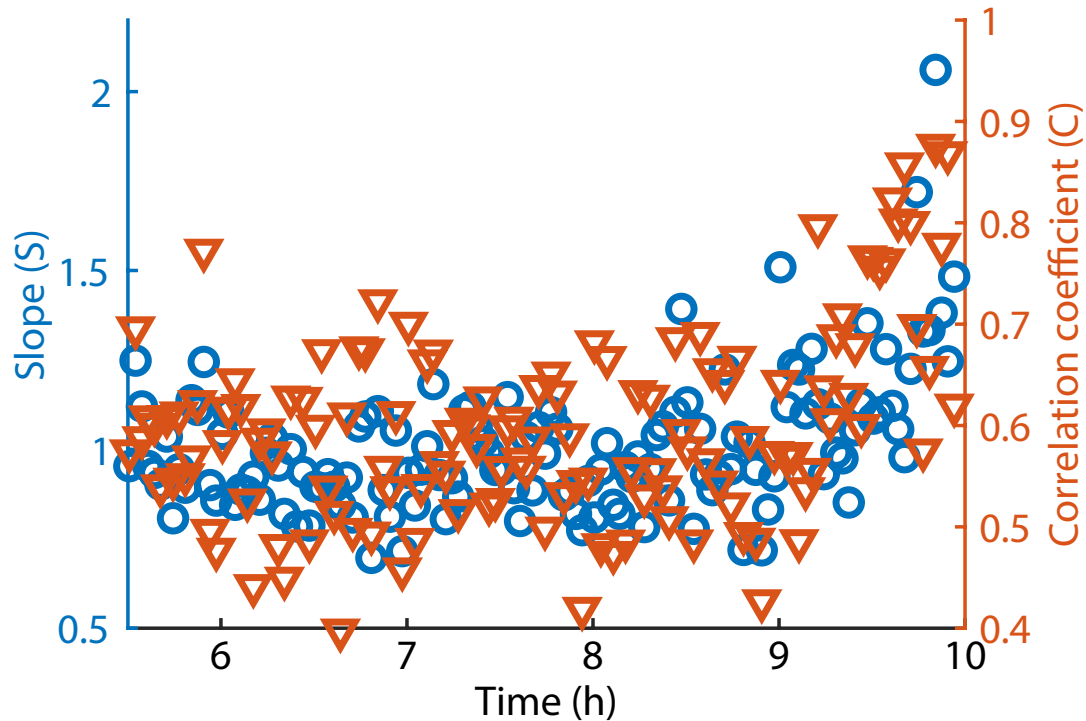

**Supplementary Figure 10.** Division events are binned at 2 min intervals to examine the mode of size regulation at each interval. This avoids mixing cells from different part of the growth-curve where the averages can differ significantly within the data. The plot of the slope ( $S$ ) of the trend-line and the correlation coefficient ( $C$ ) between the size at birth and the size at division demonstrate gradual transition from adder mode in exponential phase (before  $t = 9$  h) to a mix of timer and adder mode after cells pass through the diauxic point (after  $t = 9$  h).



208 **Note 11** *B. subtilis* behave as sizer during exit from stationary phase

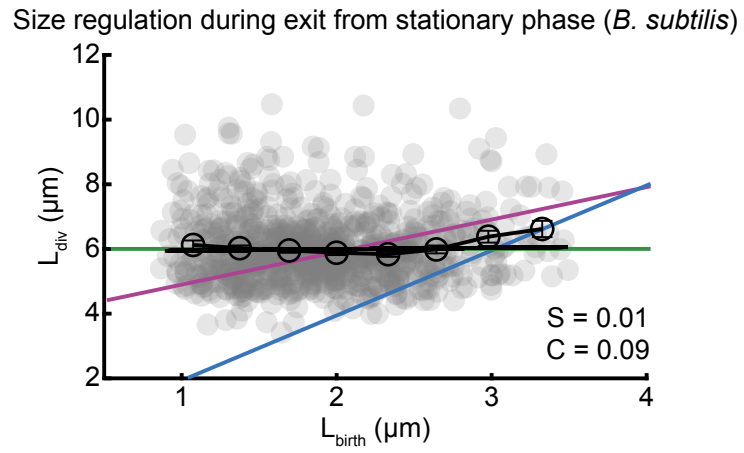

**Supplementary Figure 11.** *B. subtilis*. Correlation between cell lengths at birth and division are plotted during the exit from stationary phase.

209 **Note 12 PSF artifacts in agar-pad images**

210 To ensure that the cells in mother-machine are representative of cells in the batch culture, we collected cells from  
211 batch cultures and compared their size and gene-expression with cells growing in the mother machine at the same time  
212 points (see Figure 2b-d, main text). Except few points near the entry to the stationary phase, the cell size and gene-  
213 expression data from the mother-machine and the agar-pads matched very closely (Figure 2d). When we investigated  
214 the discrepancy near the stationary phase, we found that cells were present mostly in clumps. As mentioned earlier  
215 (Note 5), the packing of multiple cells close to each other causes light bleed-through from diffraction. The fluores-  
216 cence intensity of a cell's immediate neighbors can therefore distort its measured intensity. Investigation of the cells  
217 on agarose pad at different densities revealed that the average intensity of densely packed cells was nearly twofold  
218 higher than that of sparsely distributed cells (Figure 12b). Therefore, we concluded the origin of the discrepancy  
219 was not due to the artefact of the mother-machine platform, but rather from point spread function in agar-pad imaging.  
220

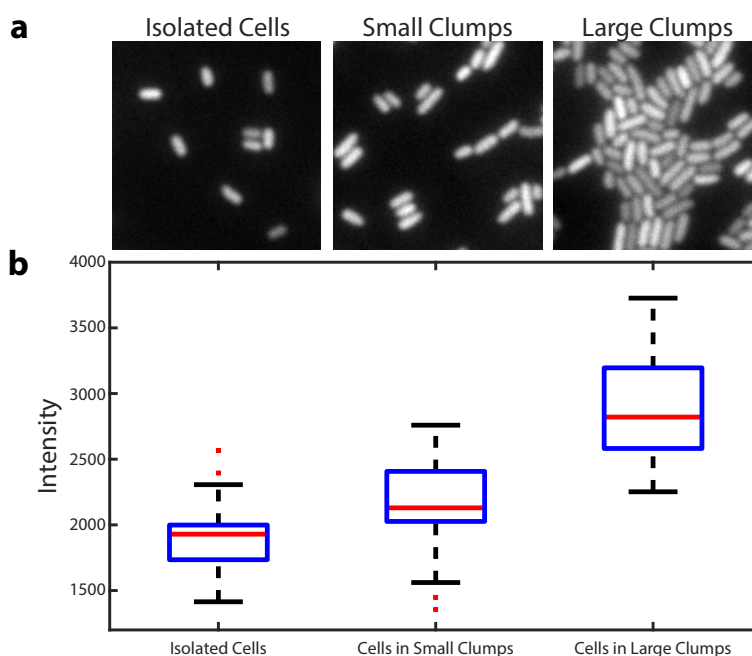

**Supplementary Figure 12.** (a) Example images of cells on agar-pad. We chose three class of cells to examine the dependence of the average intensity from a cell on the size of clump it belongs to. Left: isolated cells, middle: cells in smaller clumps consisting of two to three cells, right: bigger clumps containing 20-50 cells. (b) Average intensities of the cells in each class is plotted. This shows that typical average from an agar-pad data set from cells in stationary phase will over-estimate the true average up to 1.5 fold, accounting for the discrepancy observed between the mother-machine and batch-culture data in Figure 2c, main text.

### 221 **Note 13 Data quality, analysis, and growth-measurements**

222 For size regulation analysis, we have used a 100x phase contrast oil objective for imaging, which gives  $0.065\mu\text{m}/\text{pixel}$   
223 size. The data were collected with a frame-rate of 1 minute/frame. In a typical experiment, we collect data for  
224  $\sim 3,500$  single lineages with these settings. Roughly 50-60% of the cells stay in the trench for the entire duration of  
225 the experiment (36 h), while the rest get washed away due to filamentation or chaining. Raw data from a typical  
226 single-cell length trace is shown in Figure 13a. Segmentation error causes rare but prominent anomalies in the  
227 trend (see red arrows in (a)). In the pre-processing stage, we use a custom-build filter to remove such errors, before  
228 we perform the size-regulation analysis. A zoom of the trace in the stationary phase is shown to give a sense of  
229 the quality of size estimation from the segmentation protocol (b), since there is no growth during stationary phase  
230 ( $\langle g(t) \rangle = 0.0001/\text{minute}$ ). We estimated the segmentation error from the standard deviation of cell-lengths from  
231 individual traces during stationary phase, and found it to be subpixel (average  $\sigma = 0.7$  pixel) and independent of  
232 the cell length (c). Since the average length in exponential phase is near 80 pixels, the expected error is less than  
233 1%. A zoom of the trace in the exponential phase is shown (d). We estimate the division times from the inter-peak  
234 distances and the distribution of all such events from a single experiment is shown in (f). The long tail is due to  
235 transient chaining events. The cell length increases exponentially with the time between two consecutive division  
236 events. A collection of such intervals from the trace in (a) is shown in (e). The specific growth-rate  $g(t)$  is estimated  
237 from the slope of the  $\log_2(\text{cell-length})$  at each interval (f). The distribution of estimated growth-rates from all such  
238 intervals from one experiment is shown in (g). The mean growth-rate is  $0.044/\text{minute}$ , which corresponds to a size  
239 doubling time of 22.7 minute and is remarkably consistent with the average number doubling time or division time  
240  $23.3 \pm 5.6$  min.

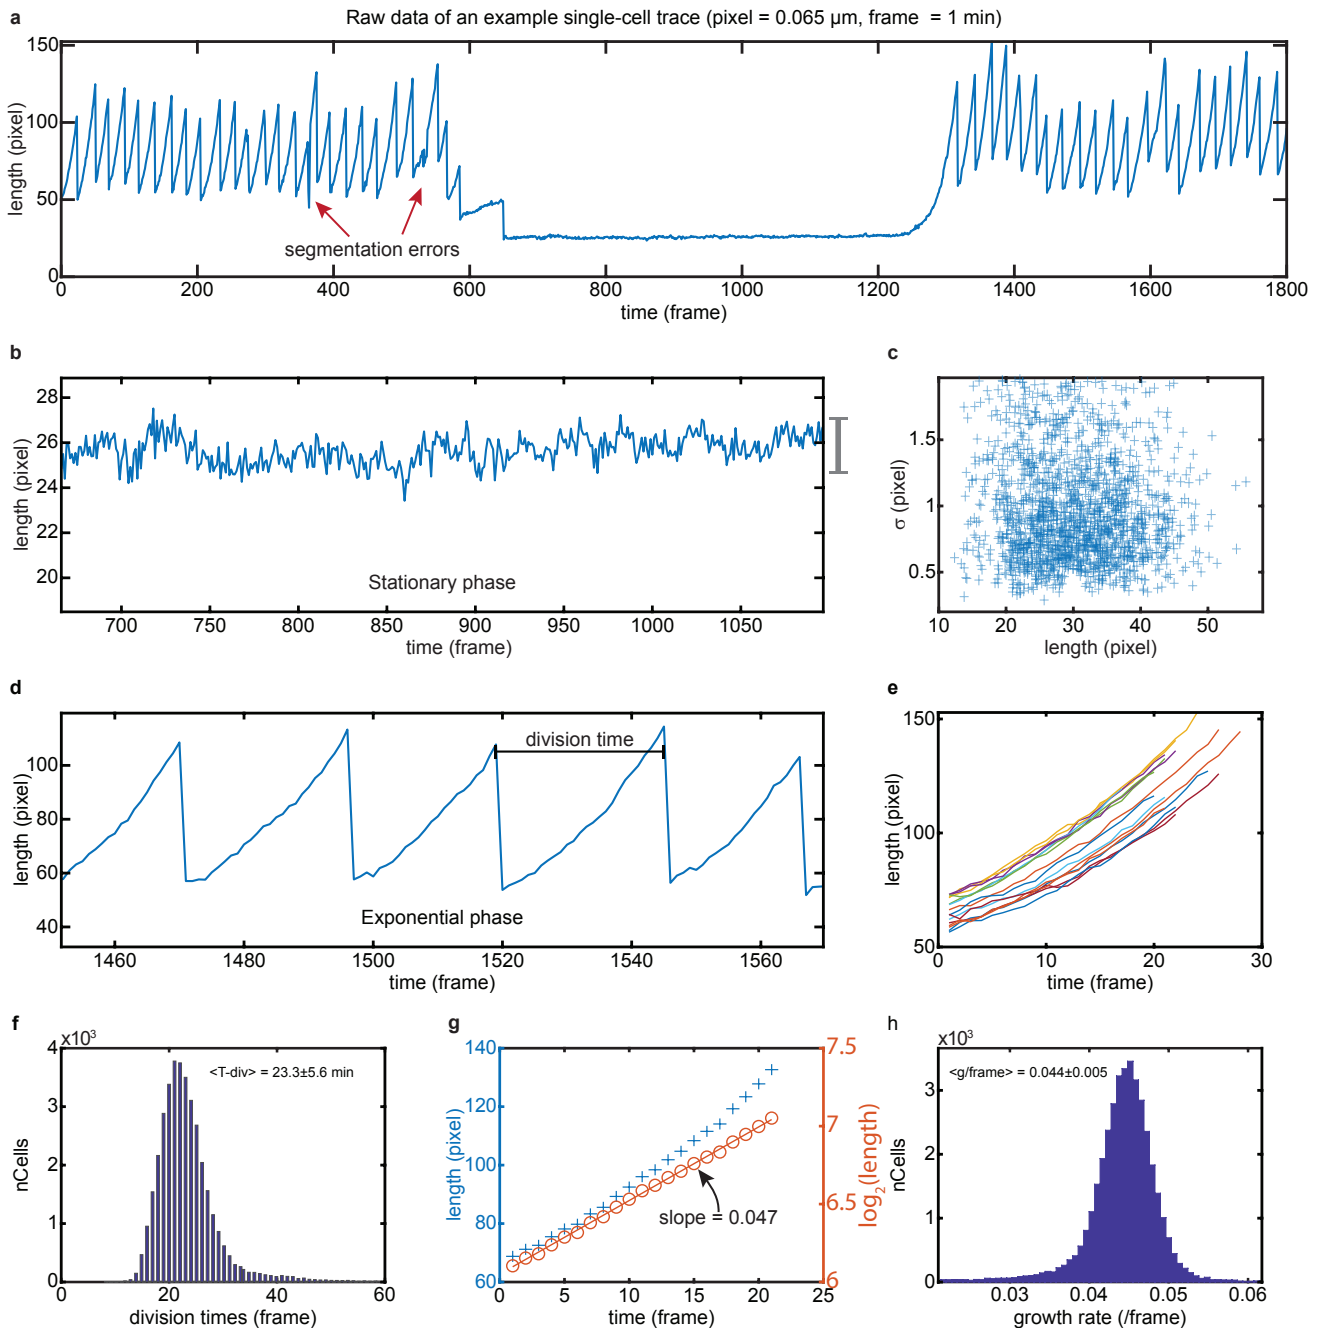

**Supplementary Figure 13.** (a) Example: raw-data from a single-cell trace is shown during entry and exit from stationary phase. (b) Zoom of cell-length from the stationary phase is shown to illustrate the magnitude of fluctuations in the measurements. Measurement error is estimated from each trace as the standard deviation of lengths in stationary phase. In (c) we plot the measurement error vs average cell length for each trace in stationary phase. Cell-lengths and measurement errors are reported in pixels (1 pixel =  $0.065 \mu\text{m}$ ). (d) A zoom of the data from exponential phase is shown. The time-gap between two consecutive peaks is used as an estimate for division times. A collection of time-series of cell lengths within such intervals from a single-cell length trace is shown in (e). The length seems to increase exponentially over time. (f) Distribution of all the division times estimated from all the cells ( $N = 2,215$ ) imaged in this experiment. (g) The specific growth rate for each cell during a particular interval is calculated from the slope of the  $\log_2(\text{cell-length})$  vs time plot. The raw cell length is plotted in left-axis (blue crosses), while  $\log_2(\text{cell-length})$  is plotted in the right-axis (orange circles). The slope for this particular trace is 0.047. (h) Distribution of slopes (specific growth-rate) from all such intervals from all the cells in this experiment is shown.

241 **Note 14 Rate-maintenance and cell size in stationary phase**

242 The ‘rate-maintenance’ phenomenon causes cells to divide and become smaller during the entry to stationary phase.  
 243 However, since this is a consequence of multifork replication, which in turn is consequence of fast growth in rich  
 244 conditions, we examined if the size-reduction during entry to stationary phase ceases in poor growth-conditions.  
 245 In Figure 14, we plot the distribution of cell sizes in different growth-phases and during birth-division for two  
 246 different media conditions. The summary statistics of the distributions are provided below (Table 1). To quantify  
 247 the net size reduction resulting from rate-maintenance we compare the distribution of birth-sizes to the average  
 248 sizes in stationary phase, since cells don’t grow and divide in the stationary phase. In case of rich defined medium  
 249 (EZRDM), cells become 2.2x smaller in stationary phase compared to the average birth-size in exponential phase.  
 250 This size-reduction factor was same for all three different temperatures examined in this paper (30, 37 and 40°C).  
 251 However, in poor defined medium (MBM), the size distribution of stationary phase and birth-size in exponential  
 252 phase match closely, supporting the hypothesis that in the absence of rate-maintenance cells simply halt growth upon  
 253 starvation. This suggests that at least under the conditions examined in this paper, rate-maintenance is the major if  
 254 not the only mechanism responsible for cell-size drop during entry to stationary phase.

**Distribution of cell-lengths in different phases of growth and cell-cycle**

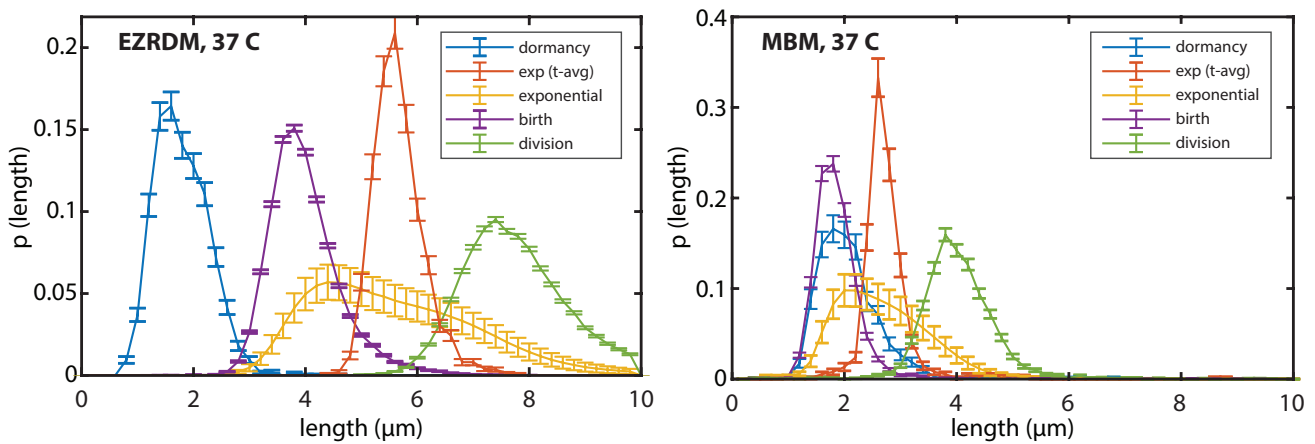

**Supplementary Figure 14.** Comparison of cell size distribution in different phases of growth-curve (during dormancy or stationary phase, and in exponential phase), and birth-division sizes in exponential phase. The observed broad distribution of cell-size in exponential phase is a result of the spread in size from birth to division, and a time-averaged value for each cell (orange curve) follows a much narrower distribution. Left: results relative to rich defined medium (EZRDM). Right: results relative to poor defined medium (MBM).

| Growth condition | $L_{\text{birth}}(\mu\text{m})$ | $L_{\text{div}}(\mu\text{m})$ | $L_{\text{stationary}}(\mu\text{m})$ | $L_{\text{exponential}}(\mu\text{m})$ | Doubling time (min) |
|------------------|---------------------------------|-------------------------------|--------------------------------------|---------------------------------------|---------------------|
| EZRDM, 37°C      | $4.05 \pm 0.61$                 | $7.99 \pm 1.051$              | $1.90 \pm 0.51$                      | $5.85 \pm 0.49$                       | $23.5 \pm 5.1$      |
| MBM, 37°C        | $1.99 \pm 0.82$                 | $4.08 \pm 0.99$               | $2.08 \pm 0.40$                      | $2.78 \pm 0.29$                       | $50.9 \pm 13.3$     |

**Supplementary Table 1.** Statistics of distributions in rich defined medium (EZRDM) and poor defined medium (MBM).

**Note 15 Size regulation in different temperatures**

| <b>Growth condition</b> | <b>Doubling time (min)</b> | <b>C (exponential)</b> | <b>C (entry)</b> | <b>C (exit)</b> |
|-------------------------|----------------------------|------------------------|------------------|-----------------|
| EZRDM, 37°C             | 23.5 ± 5.0                 | 0.51                   | 0.74             | 0.10            |
| EZRDM, 30°C             | 36.3 ± 6.8                 | 0.45                   | 0.55             | 0.11            |
| EZRDM, 40°C             | 24.5 ± 4.6                 | 0.50                   | 0.67             | 0.04            |

**Supplementary Table 2.** Comparing cells in rich defined medium (EZRDM) at three temperatures shows that the size-regulation in different growth-phases does not change significantly with temperature. According to the ‘rate-maintenance’ mechanism, we expect the size-regulation during entry to stationary phase to depend on the replication frequency. Consistent with this, for  $T = 30^\circ\text{C}$ , where the doubling time is comparable to the replication time, the ‘timer’-like aspect during entry almost disappears.

256 **Note 16 Bulk measurements of persisters**

257 To estimate the persister frequencies in bulk cultures, we followed the protocol described by Balaban *et al.* [7]. A  
258 flask with 50 ml of fresh media, either Luria-Bertani (LB) or EZRDM (EZ Rich Defined Medium) supplemented  
259 with F108 (0.8 mg/l) was inoculated with 10  $\mu\text{m}$  of an overnight culture of the SB7 strain (please see [Note 18](#) for  
260 details). Cultures were incubated at 37°C and 220 rpm for 24h or 48h. Once the incubation period was over, 50  $\mu\text{m}$   
261 of the stationary-phase culture was diluted into 5ml of the corresponding fresh media. At this point a sample of 100  
262  $\mu\text{m}$  was taken, serially diluted and plated to determine the number of colony forming units (cfu) at  $t = 0.5\mu\text{m}$  of  
263 ampicillin (50 mg/ml) was then added to each tube containing the 5 ml culture, and incubation was resumed for 3  
264 hours, after which a 100  $\mu\text{m}$  sample was taken, serially diluted and plated to determine the cfus of persisters. The  
265 results are shown in Table 3.

| Growth medium | Stationary phase duration = 12h                       | Stationary phase duration = 36h                       |
|---------------|-------------------------------------------------------|-------------------------------------------------------|
| LB            | $\mu = 1.7 \cdot 10^{-4}; \sigma = 0.5 \cdot 10^{-4}$ | $\mu = 3.7 \cdot 10^{-3}; \sigma = 0.6 \cdot 10^{-3}$ |
| EZRDM         | $\mu = 2.5 \cdot 10^{-4}; \sigma = 1.0 \cdot 10^{-4}$ | $\mu = 9.2 \cdot 10^{-4}; \sigma = 0.6 \cdot 10^{-4}$ |

**Supplementary Table 3.** Mean ( $\mu$ ) and standard deviation ( $\sigma$ ) of estimated frequency of persisters.

266 **Note 17 Growth-curve experiments *B. subtilis***

267 The growth-curve experiments of *B. subtilis* were done with similar microscopic settings as the ones performed with  
268 *E. coli*. The main differences were in the (a) strains used for the work, (b) protocols for growing the culture and (c)  
269 the microfluidic devices used for loading the strains that were imaged along the growth-curve. We give details of  
270 each of these three aspects below.

271  
272 *Strains:* We repeated the bacillus experiments with strains from two different backgrounds (3610 and 168) and  
273 obtained similar results. The work presented in this paper are using strains from 168 background. We used the  
274 wild-type 168 strain in the culture flask, and a strain BGD12 in the mother machine. The strain BGD12 contains a  
275 constitutive mCherry expression cassette, and a straight flagellum mutation (hagA233V) that prevents the flagellum  
276 from generating force so that motile cells cannot swim out of the microfluidic channels [8].

277  
278 *Growth-curve:* Cells were grown in a rich defined medium that was optimized for *B. subtilis* (Lab protocol). The  
279 average division time of *B. subtilis* cells in this medium at 37°C in our setup is 21 min. We added 0.1% BSA in  
280 the culture flask to prevent cells from sticking to the tubing in the flow path<sup>9</sup>. Since *B. subtilis* cells require more  
281 aeration than *E. coli* cells, the volume of culture in the flask was reduced (100ml culture in 500ml baffled bottom  
282 flask) to increase surface-to-volume ratio.

283  
284 *Sample preparation:* Since *B. subtilis* cells are slightly longer and wider compared to *E. coli* cells in the  
285 exponential phase, and tends to chain more frequently, we used a different microfluidic device design for the  
286 experiments with *B. subtilis* cells. For the experiments described in this paper, we chose trench dimensions that  
287 are optimal for the dimensions of *B. subtilis* cell in exponential phase, where cells are largest, and to minimize  
288 loss events from stochastic chaining (trench-length = 35  $\mu\text{m}$ , trench width = 1.7  $\mu\text{m}$ , trench height = 1.3  $\mu\text{m}$ ). The  
289 surface of the microfluidic devices were passivated with 0.1% BSA, as described in our previous work [8]. Chips  
290 were spun at 5000 rcf for 10 min to load the cells and cells from the feeding channel were washed with fast flow of  
291 media from a syringe (40  $\mu\text{m}/\text{min}$ ) and then the flow-rate was reduced to 20  $\mu\text{m}/\text{min}$  for the rest of the experiment.



292 **Note 18 Strain construction control**

293 For all the *E. coli* experiments described in this paper we have used the MG1655 7740 background, which was  
294 used by the Blattner lab for the complete sequencing of *E. coli* K-12. However, this strain has an insertion of  
295 IS1H at *flhDC*, which causes hyper-motility and therefore causes the bacterial cells to swim out of the mother  
296 machine trenches. To avoid this, we have inserted  $\Delta$ *motA* using P1 transduction from the corresponding strain in  
297 keio collection [9]. The strain SB8 used in all the size-regulation work described in this work is MG1655 7740  
298 with  $\Delta$ *motA*. The size-regulation work involved only phase contrast microscopy, and therefore did not require any  
299 fluorescent markers. For the stress-response work, we used a strain that constitutively expresses mCherry1-11-mKate  
300 from the *glmS* site. This strain (SB7), constructed by integrating *glmS::PRNAI-mCherry1-11-mKate-T1 terminator-*  
301 *FRT Kan FRT::pstS* into the SB8, enables us to get a bright fluorescence image of cell in RFP channel and is used  
302 for single-cell segmentation. To ensure the measurements performed in this study did not have artefacts from the  
303  $\Delta$ *motA* or the mCherry1-11-mKate expression, we have performed control experiments to check and validate the  
304 results with other strains. We have compared the results of stress-response dynamics along the growth curve between  
305  $\Delta$ *motA* and  $\Delta$ *fliC*, which also renders the cell non-motile, and finally compared with the MG1655 6300, which is  
306 much less motile than 7740 version and found that the results were identical. We have also checked the frequency of  
307 persisters between the wild-type cell (MG1655 6300) and the strain used in the persister experiments (SB7) using  
308 bulk experiments and found the frequencies to be same (0.01 for both after overnight stationary phase and 3 hours  
309 long treatment with 50  $\mu$ m/ml ampicillin).

310 **Note 19 Media Recipes**

311 **EZRDM (EZ-Rich Defined Medium, optimized recipe).** The medium is based on the recipe developed by  
312 Neidhardt *et al.* [10]. The MOPS EZ Rich Defined Medium Kit is available commercially (Teknova, #M2105)  
313 and was optimized for osmolarity with 5M NaCl according to work by Konopka *et al.* [11]. For 1L of media mix  
314 together the following components:

|                                        |         |
|----------------------------------------|---------|
| 10X MOPS                               | 100ml   |
| 5X EZ Supplement                       | 200ml   |
| 10X ACGU                               | 100ml   |
| 0.132 MK <sub>2</sub> HPO <sub>4</sub> | 10ml    |
| 20% Glucose                            | 10ml    |
| 5M NaCl                                | 15.2ml  |
| Sterile H <sub>2</sub> O               | 564.8ml |

315 Filter the medium using sterile filters (0.22  $\mu$ m) and store in smaller batches at 4°C (up to a week) or at -20°C  
316 (up to few weeks).

317 **MBM (Poor Defined Medium, optimized recipe).** The medium is based on the recipe developed by Neidhardt  
318 *et al.* [10]. The MOPS Minimal Defined Medium Kit is available commercially (Teknova, #M2106) and was  
319 optimized for osmolarity. For 1L of media mix together the following components:

|                                        |         |
|----------------------------------------|---------|
| 10X MOPS                               | 100ml   |
| 0.132 MK <sub>2</sub> HPO <sub>4</sub> | 10ml    |
| 20% Glucose                            | 10ml    |
| 5M NaCl                                | 19.6ml  |
| Sterile H <sub>2</sub> O               | 860.4ml |

320 Filter the medium using sterile filters (0.22  $\mu$ m) and store in smaller batches at 4°C (up to a week) or at -20°C  
321 (up to few weeks).

322 **Pluronic Solution.** Mix 100gr of Pluronic F108 (Sigma Aldrich, 542342-250G) in 1L of sterile H<sub>2</sub>O and mix  
323 with a magnetic stir bar. Once dissolved, filter the solution using 0.22  $\mu$ m sterile filters and store at room temperature.

## 324 **References**

- 325 1. Vigolo, D., Radl, S. & Stone, H. A. Unexpected trapping of particles at a T junction. *Proceedings of the*  
326 *National Academy of Sciences* **111**, 4770–4775 (2014).
- 327 2. Liu, V. A., Jastromb, W. E. & Bhatia, S. N. Engineering protein and cell adhesivity using PEO-terminated  
328 triblock polymers. *Journal of biomedical materials research* **60**, 126–134 (2002).
- 329 3. Potvin-Trottier, L., Lord, N. D., Vinnicombe, G. & Paulsson, J. Synchronous long-term oscillations in a  
330 synthetic gene circuit. *Nature* **538**, 514–517 (2016).
- 331 4. Uphoff, S. *et al.* Stochastic activation of a DNA damage response causes cell-to-cell mutation rate variation.  
332 *Science* **351**, 1094–1097 (2016).
- 333 5. MATLAB. *version 9.7.0 (R2019b)* (The MathWorks Inc., Natick, Massachusetts, 2019).
- 334 6. Zaritsky, A. & Helmstetter, C. E. Rate maintenance of cell division in *Escherichia coli* B/r: analysis of a simple  
335 nutritional shift-down. *Journal of bacteriology* **174**, 8152–8155 (1992).
- 336 7. Balaban, N. Q., Merrin, J., Chait, R., Kowalik, L. & Leibler, S. Bacterial persistence as a phenotypic switch.  
337 *Science* **305**, 1622–1625 (2004).
- 338 8. Norman, T. M., Lord, N. D., Paulsson, J. & Losick, R. Memory and modularity in cell-fate decision making.  
339 *Nature* **503**, 481–486 (2013).
- 340 9. Baba, T. *et al.* Construction of *Escherichia coli* K-12 in-frame, single-gene knockout mutants: the Keio  
341 collection. *Molecular systems biology* **2**, 2006–0008 (2006).
- 342 10. Neidhardt, F. C., Bloch, P. L. & Smith, D. F. Culture medium for enterobacteria. *Journal of bacteriology* **119**,  
343 736–747 (1974).
- 344 11. Konopka, M. C. *et al.* Cytoplasmic protein mobility in osmotically stressed *Escherichia coli*. *Journal of*  
345 *bacteriology* **191**, 231–237 (2009).
